# Supplementary material for: Evolution and biogeography of the endemic Roucela complex (Campanulaceae: Campanula) in the Eastern Mediterranean
Source: PubMed Central journal article supplement (PMC6102515; doi:10.1002/ece3.1791), 2015-10-28

Campanuloideae plastid dataset  
Maximum Likelihood  
1000BS

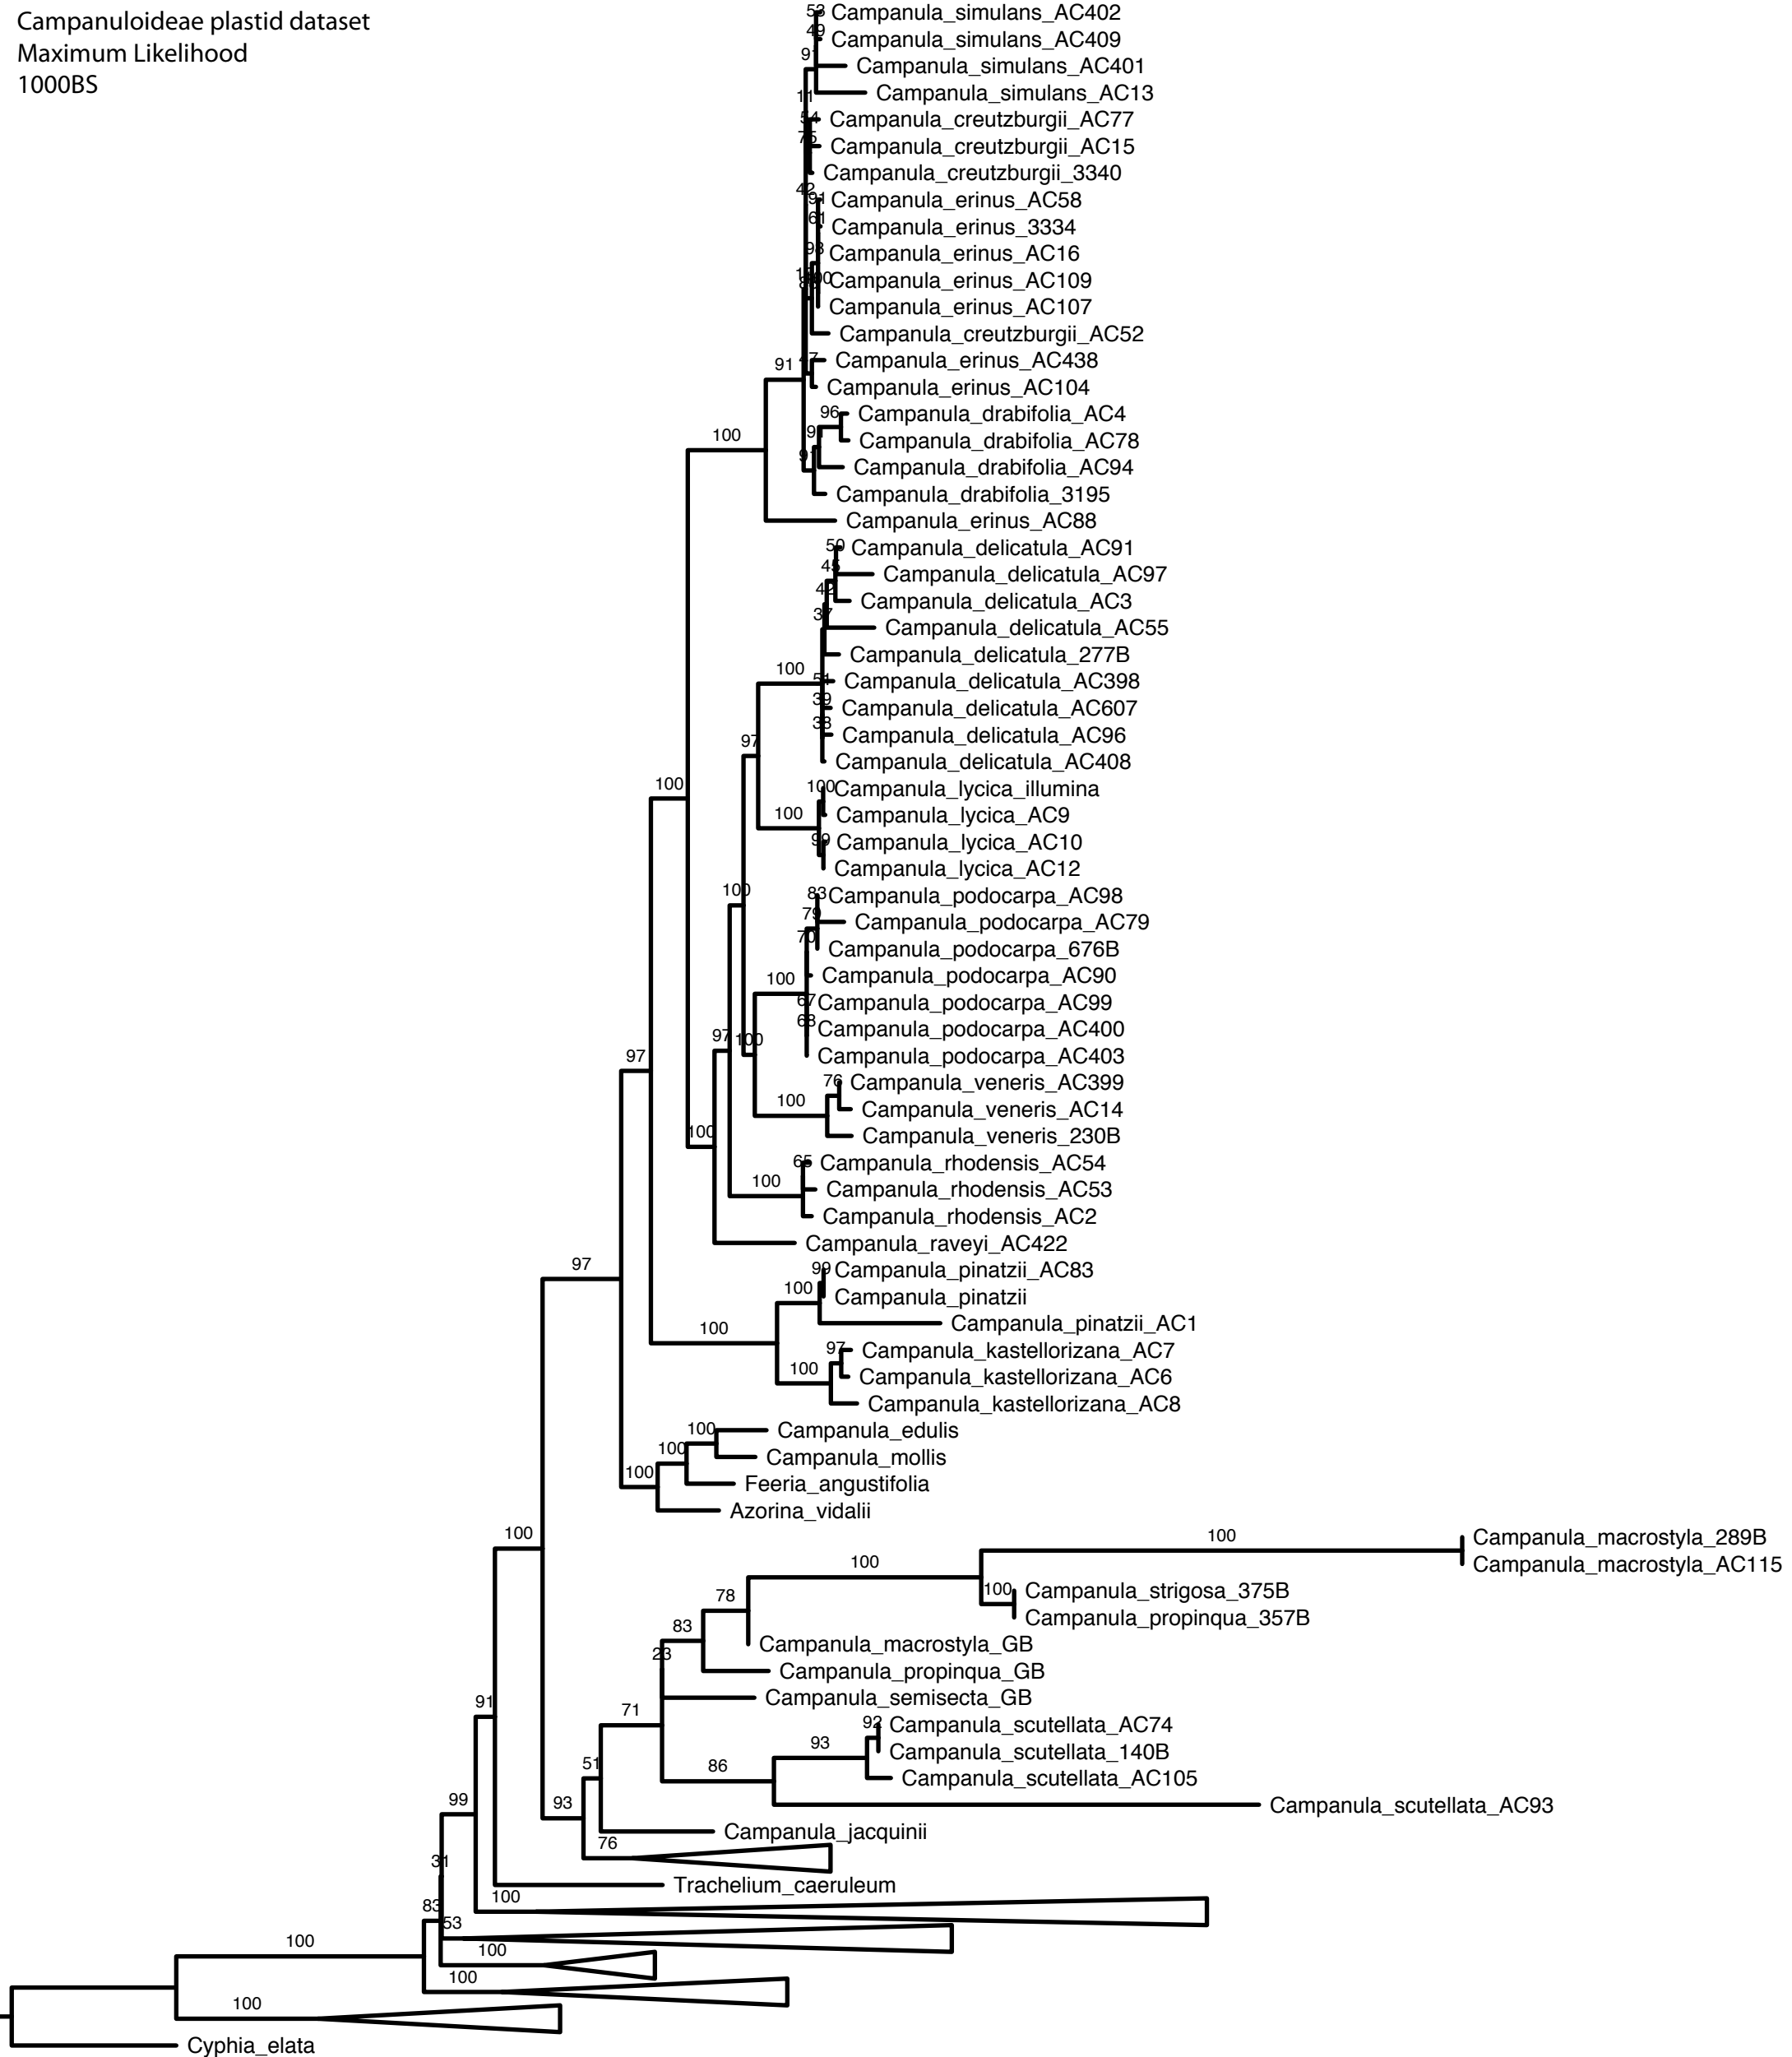

Campanuloideae nuclear dataset

Maximum Likelihood

1000BS

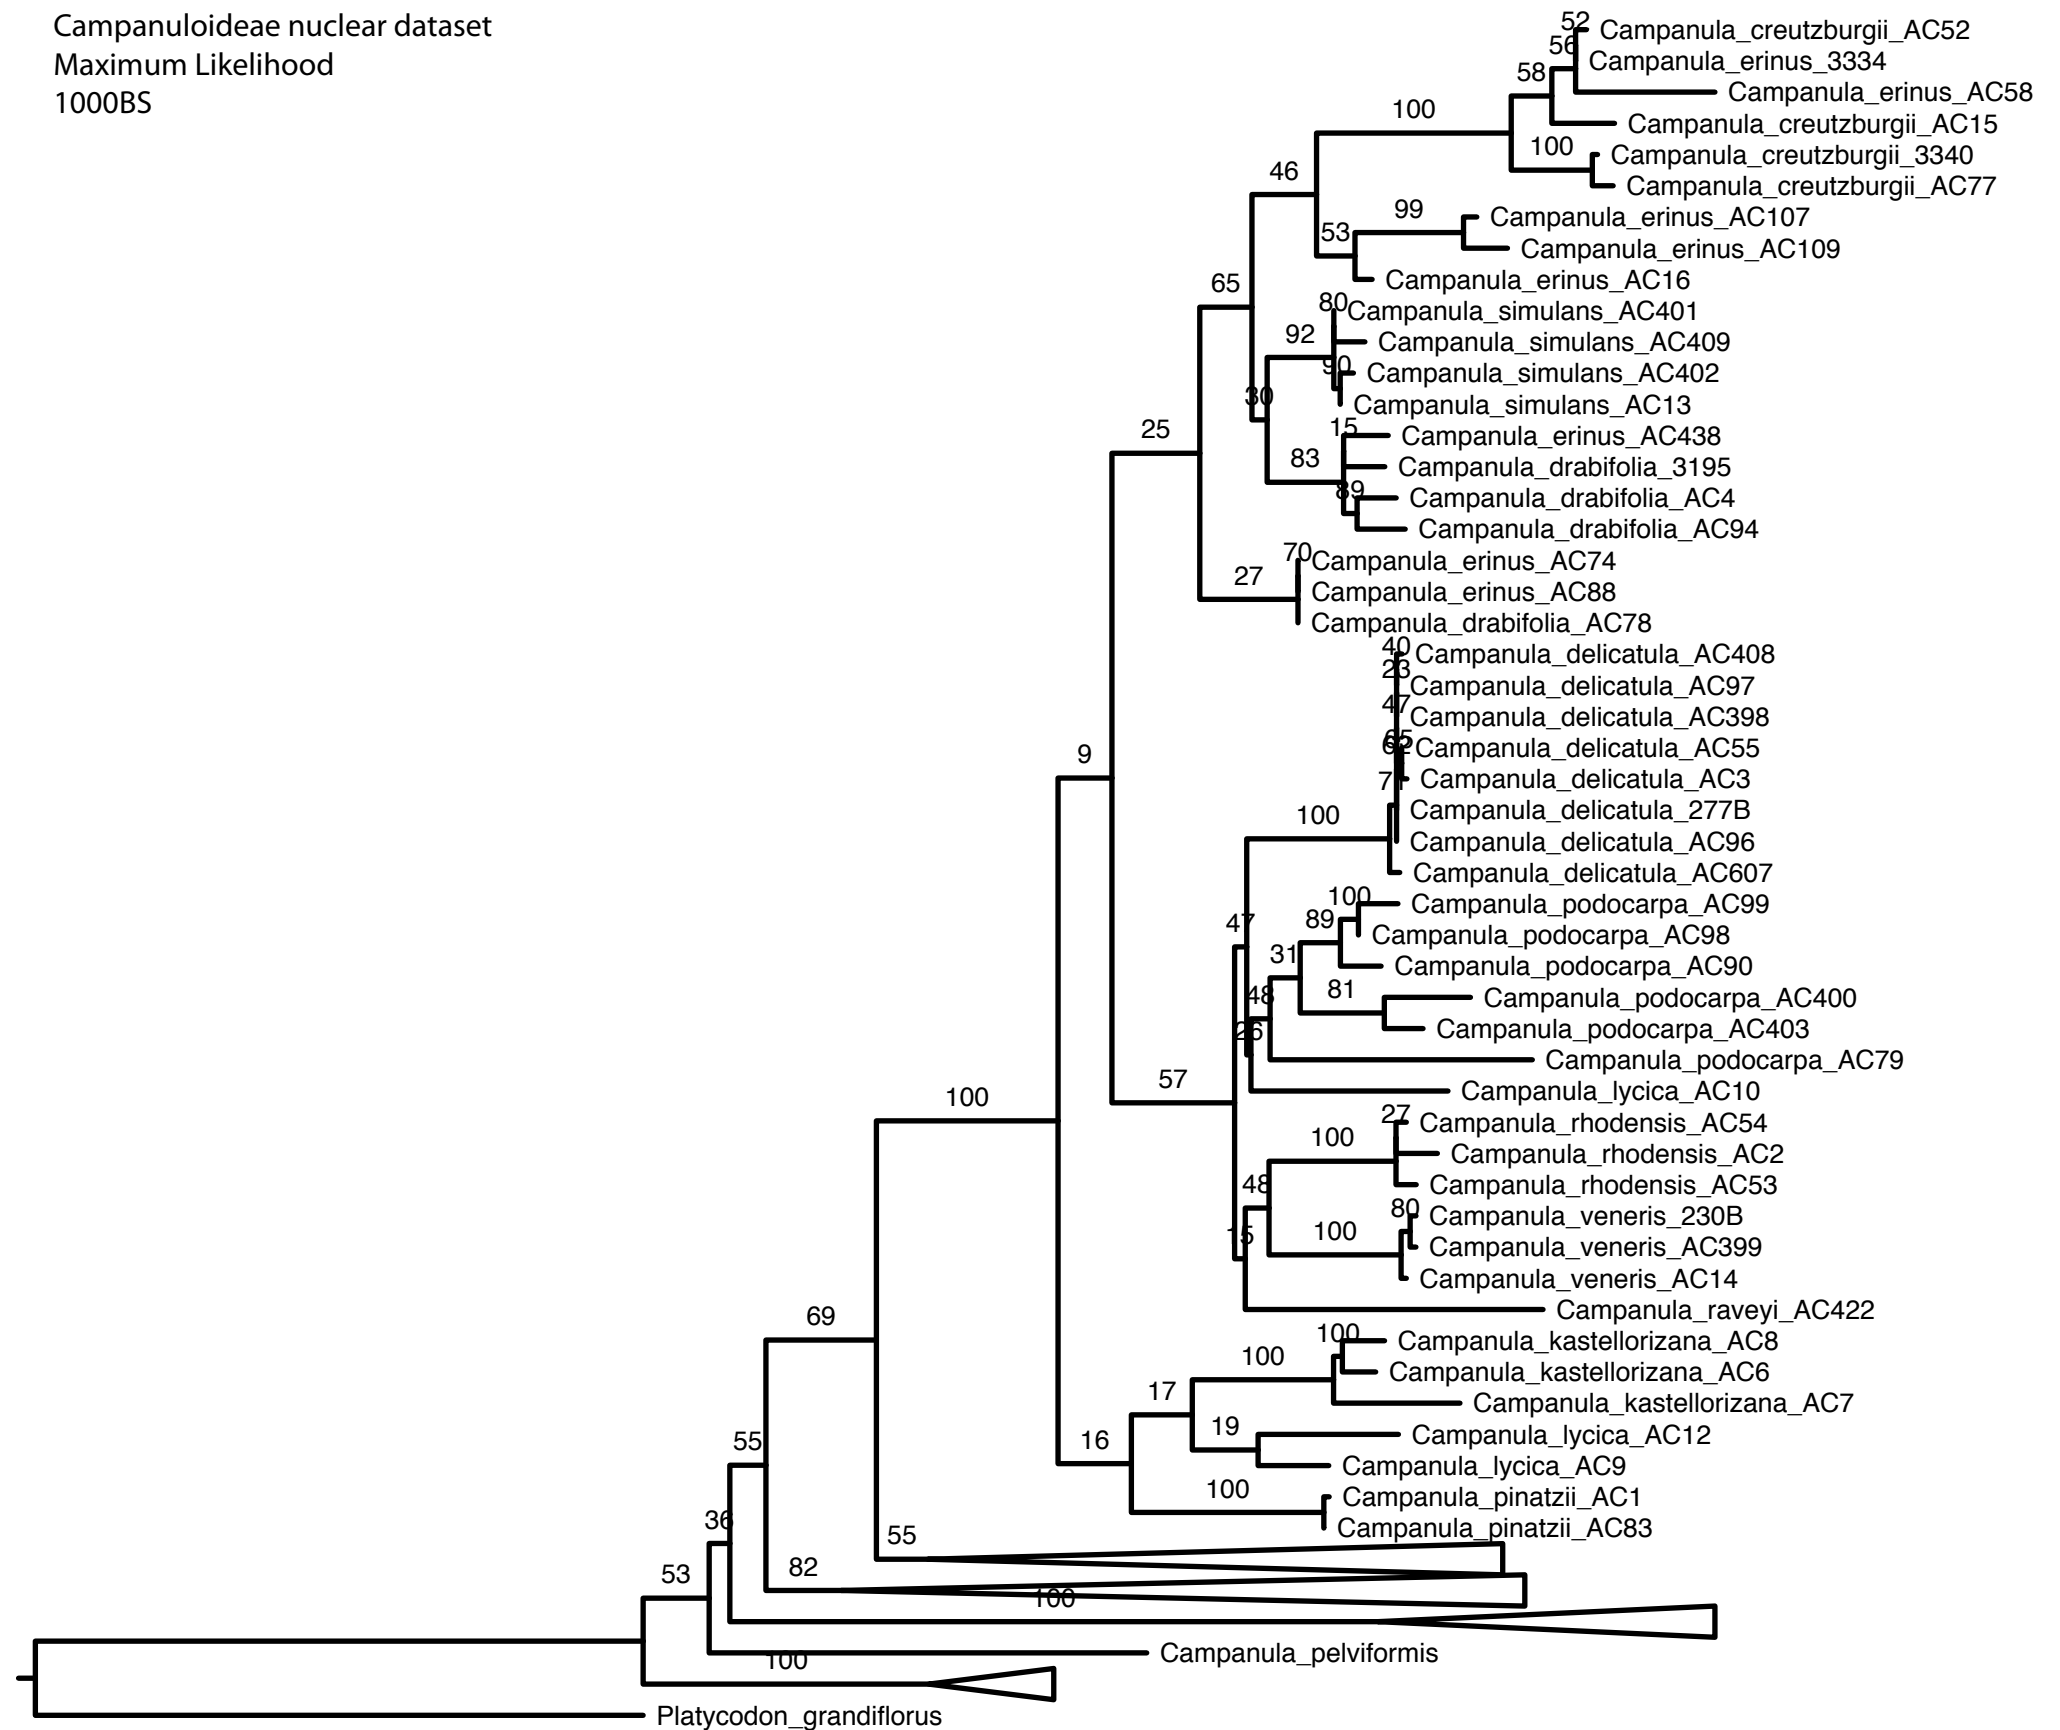

Campanuloideae plastid+nuclear dataset

Maximum Likelihood

1000BS

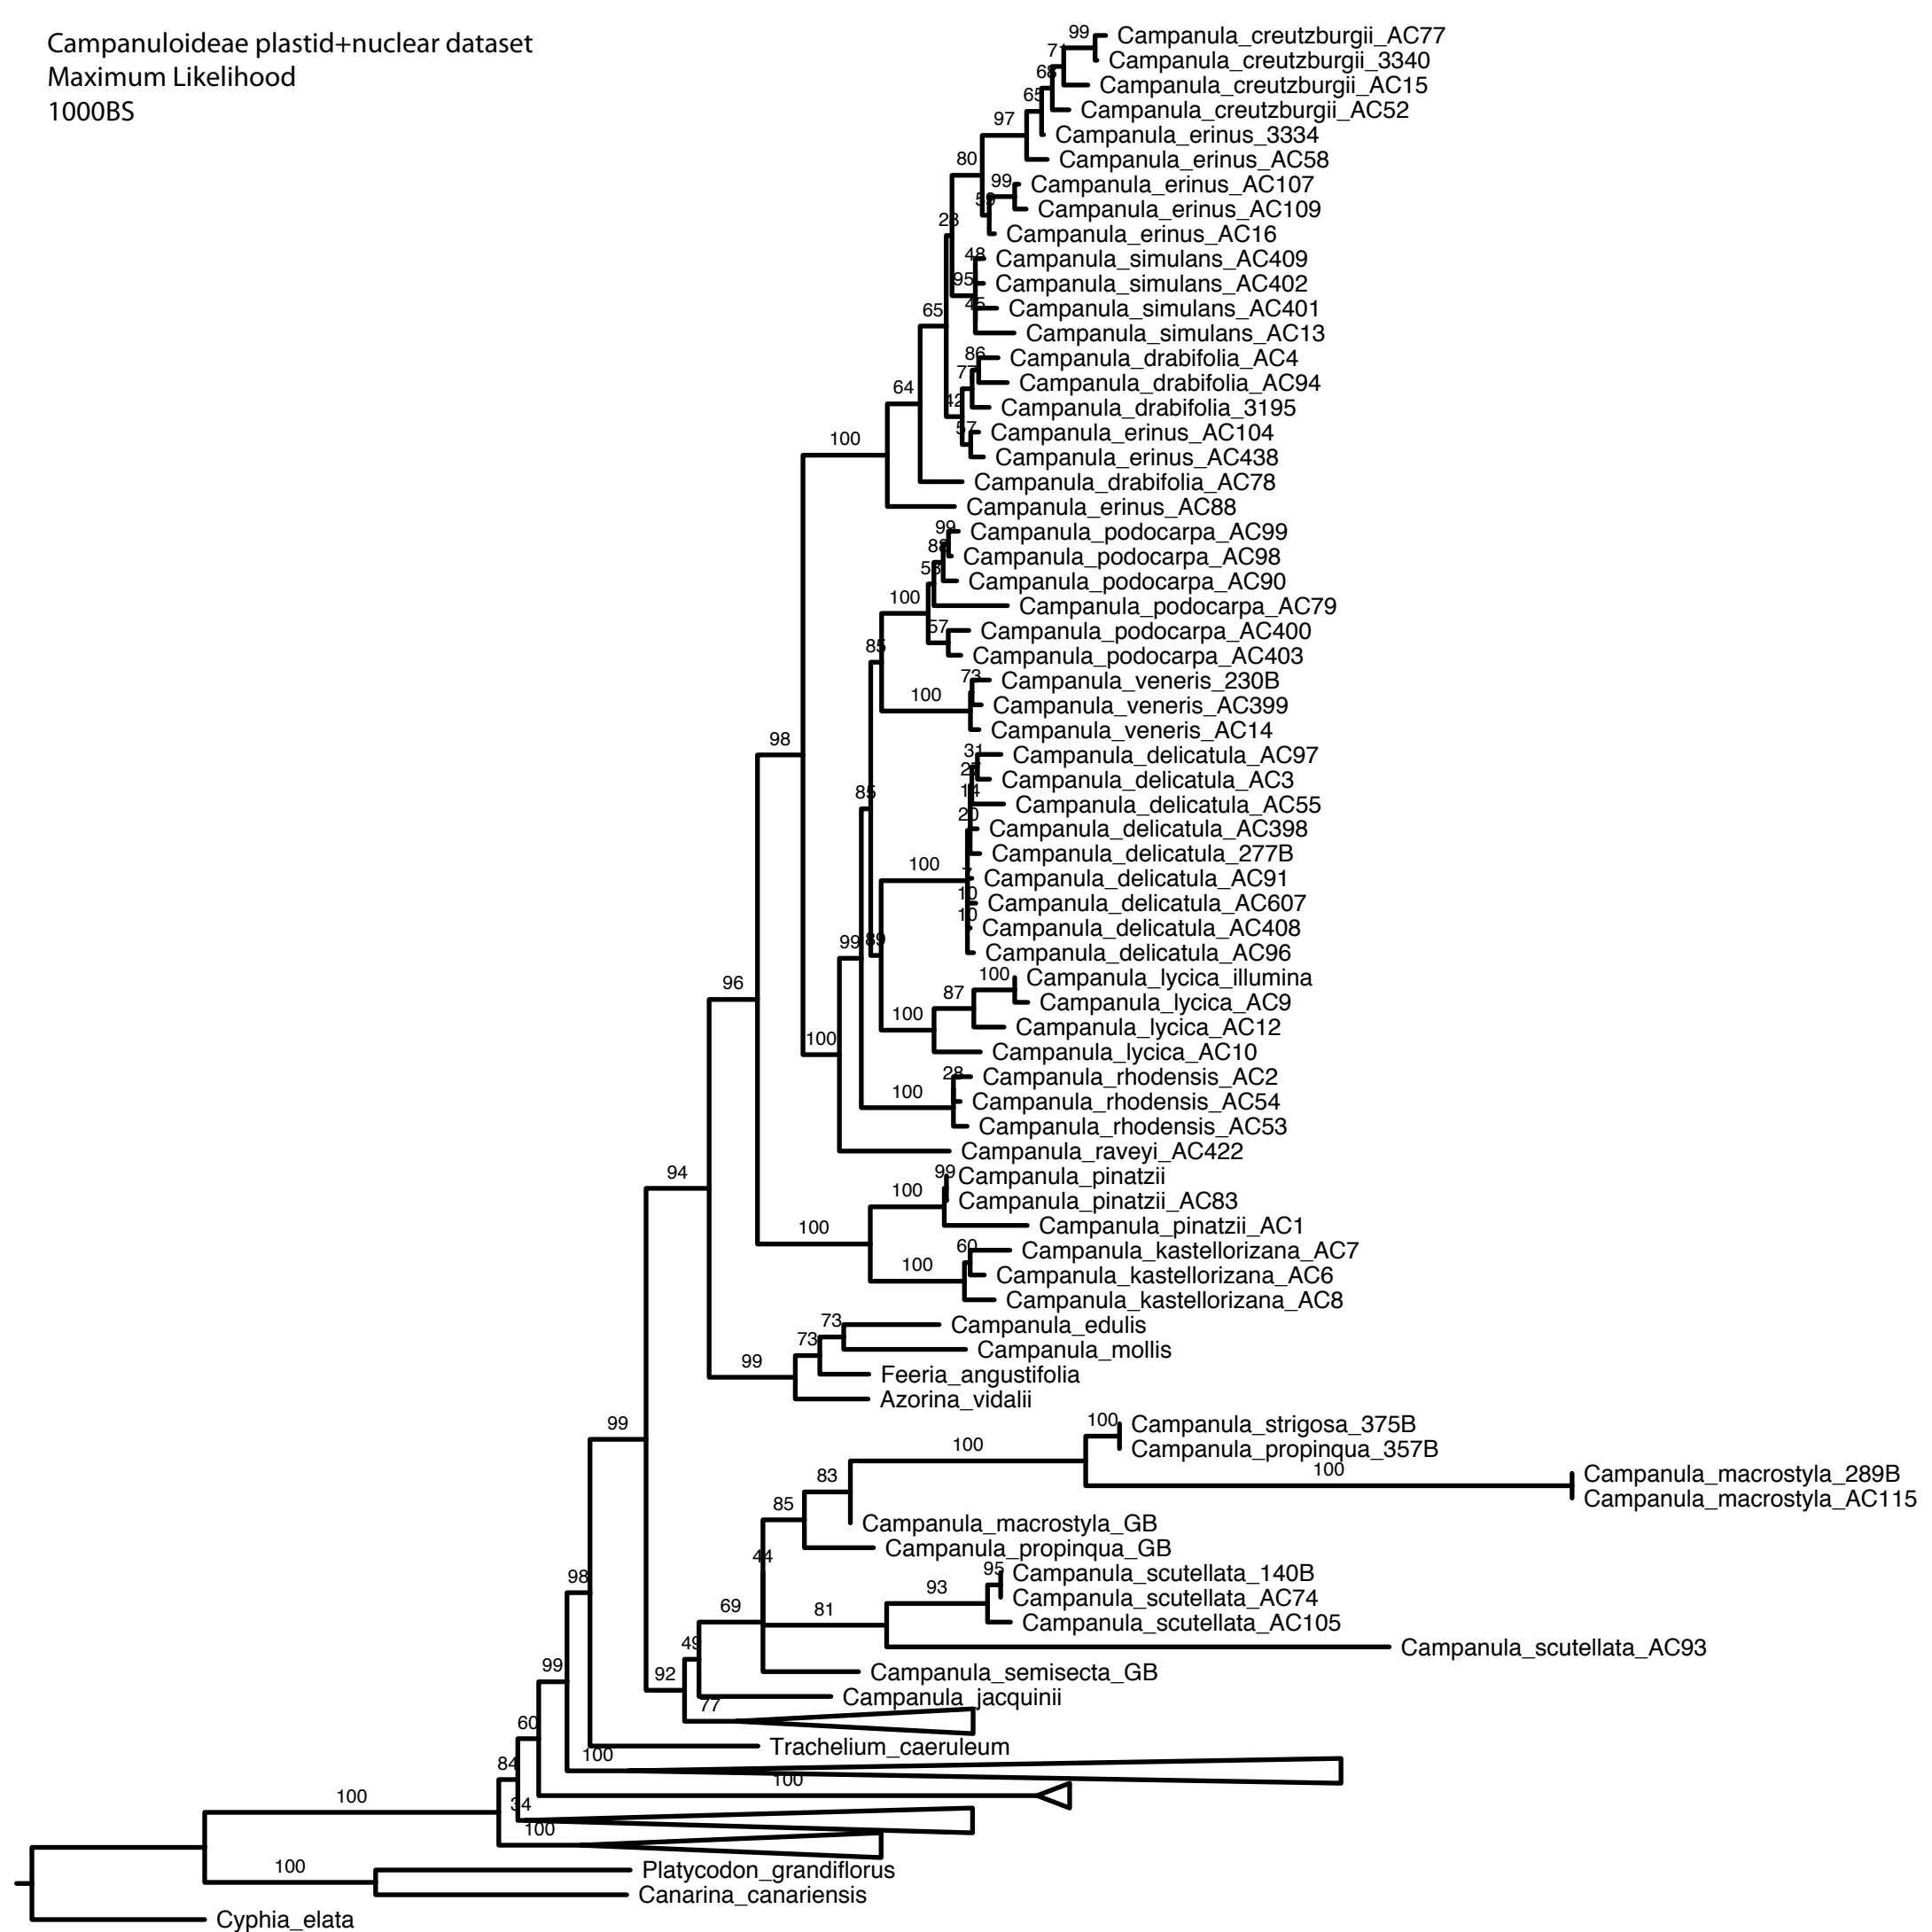

Supplement: ECE3-5-5329-s002.pdf [file ECE3-5-5329-s002.pdf]
