# Supplementary material for: Evolution and biogeography of the endemic Roucela complex (Campanulaceae: Campanula) in the Eastern Mediterranean
Source: PubMed Central journal article supplement (PMC6102515; doi:10.1002/ece3.1791), 2015-10-28
Supplement: ECE3-5-5329-s003.pdf [file ECE3-5-5329-s003.pdf]

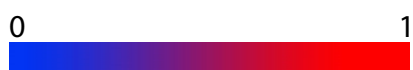

PP

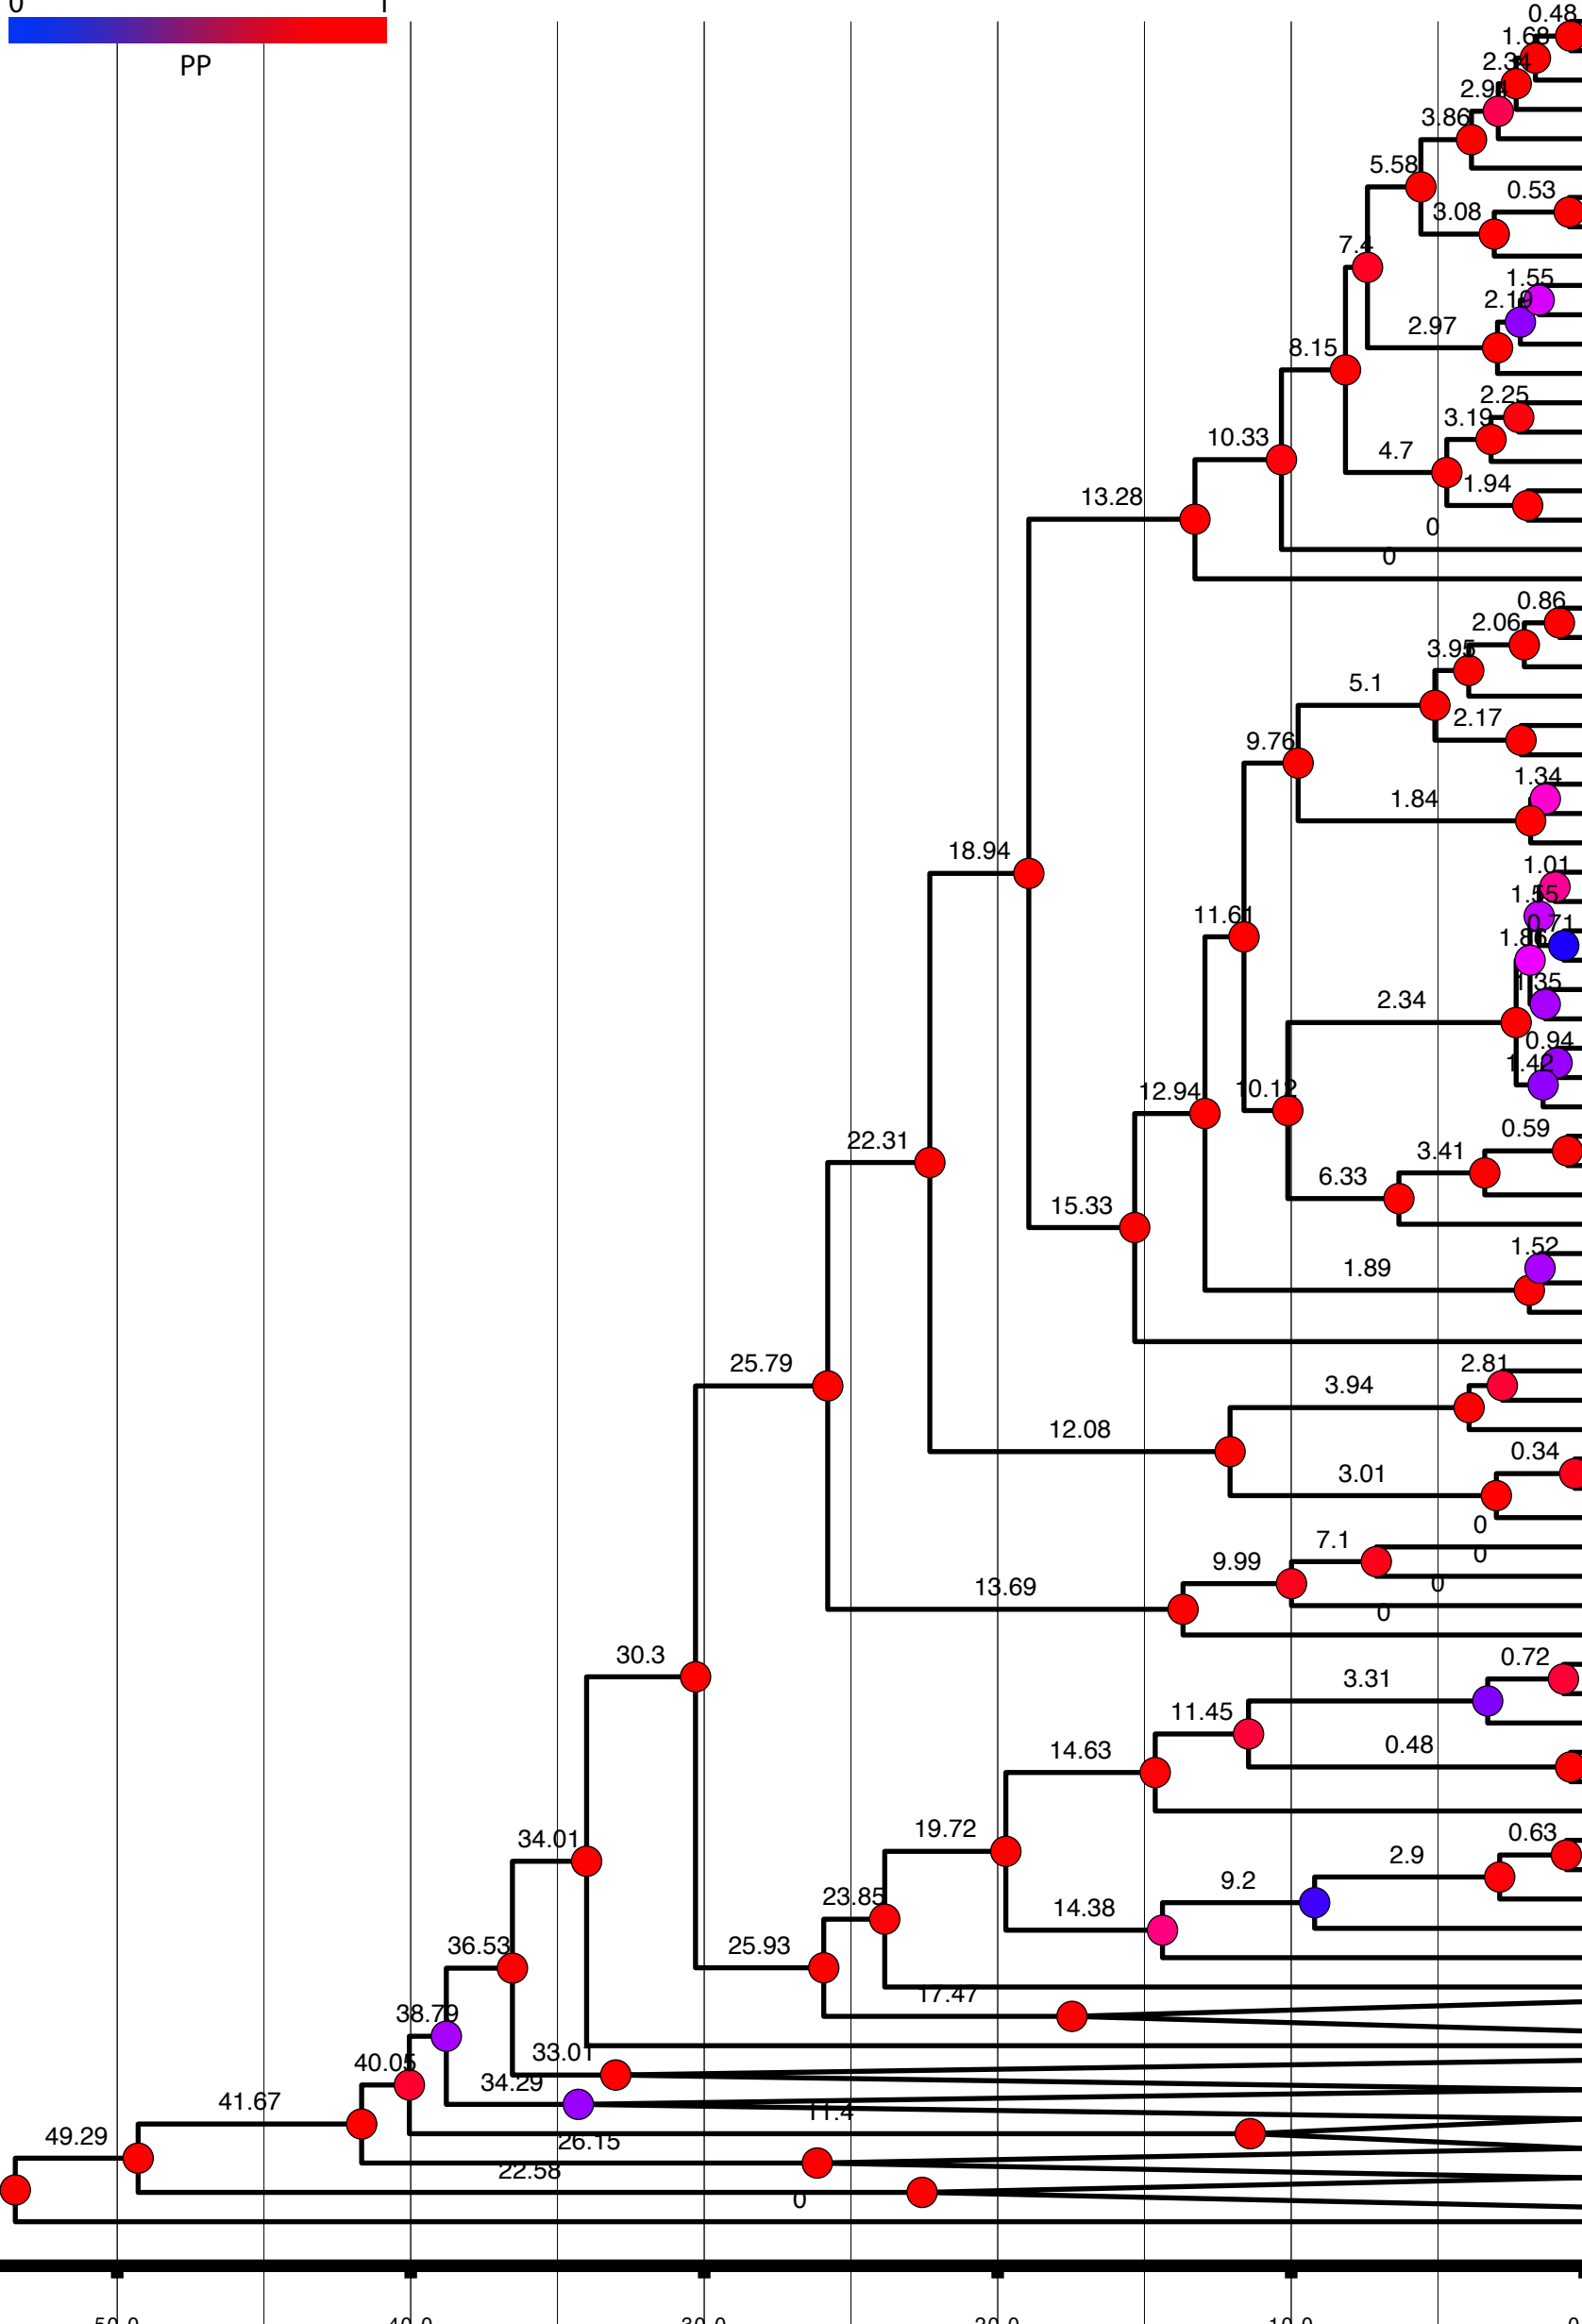

- Campanula\_creutzburgii\_3340
- Campanula\_creutzburgii\_AC77
- Campanula\_creutzburgii\_AC15
- Campanula\_creutzburgii\_AC52
- Campanula\_erinus\_3334
- Campanula\_erinus\_AC58
- Campanula\_erinus\_AC107
- Campanula\_erinus\_AC109
- Campanula\_erinus\_AC16
- Campanula\_simulans\_AC402
- Campanula\_simulans\_AC409
- Campanula\_simulans\_AC401
- Campanula\_simulans\_AC13
- Campanula\_drabifolia\_AC4
- Campanula\_drabifolia\_AC94
- Campanula\_drabifolia\_3195
- Campanula\_erinus\_AC438
- Campanula\_erinus\_AC104
- Campanula\_drabifolia\_AC78
- Campanula\_erinus\_AC88
- Campanula\_podocarpa\_AC98
- Campanula\_podocarpa\_AC99
- Campanula\_podocarpa\_AC90
- Campanula\_podocarpa\_AC79
- Campanula\_podocarpa\_AC400
- Campanula\_podocarpa\_AC403
- Campanula\_veneris\_230B
- Campanula\_veneris\_AC399
- Campanula\_veneris\_AC14
- Campanula\_delicatula\_AC3
- Campanula\_delicatula\_AC97
- Campanula\_delicatula\_AC91
- Campanula\_delicatula\_AC55
- Campanula\_delicatula\_277B
- Campanula\_delicatula\_AC398
- Campanula\_delicatula\_AC408
- Campanula\_delicatula\_AC607
- Campanula\_delicatula\_AC96
- Campanula\_lycica\_AC9
- Campanula\_lycica\_illumina
- Campanula\_lycica\_AC12
- Campanula\_lycica\_AC10
- Campanula\_rhodensis\_AC53
- Campanula\_rhodensis\_AC54
- Campanula\_rhodensis\_AC2
- Campanula\_raveyi\_AC422
- Campanula\_kastellorizana\_AC6
- Campanula\_kastellorizana\_AC7
- Campanula\_kastellorizana\_AC8
- Campanula\_pinatzii
- Campanula\_pinatzii\_AC83
- Campanula\_pinatzii\_AC1
- Campanula\_edulis
- Campanula\_mollis
- Feeria\_angustifolia
- Azorina\_vidalii
- Campanula\_propinqua\_357B
- Campanula\_strigosa\_375B
- Campanula\_macrostyla\_GB
- Campanula\_macrostyla\_289B
- Campanula\_macrostyla\_AC115
- Campanula\_propinqua\_GB
- Campanula\_scutellata\_AC74
- Campanula\_scutellata\_140B
- Campanula\_scutellata\_AC105
- Campanula\_semisecta\_GB
- Campanula\_scutellata\_AC93
- Campanula\_jacquini
- Cyphia\_elata
