# Supplementary material for: Evolution and biogeography of the endemic Roucela complex (Campanulaceae: Campanula) in the Eastern Mediterranean
Source: PubMed Central journal article supplement (PMC6102515; doi:10.1002/ece3.1791), 2015-10-28

**Fig. S5** Chronogram inferred using a coalescent species tree approach in \*BEAST. Results from this analysis provided divergence dates an order of magnitude younger than other methods and previous studies of the group. Numbers above branches are divergence dates in millions of years ago.

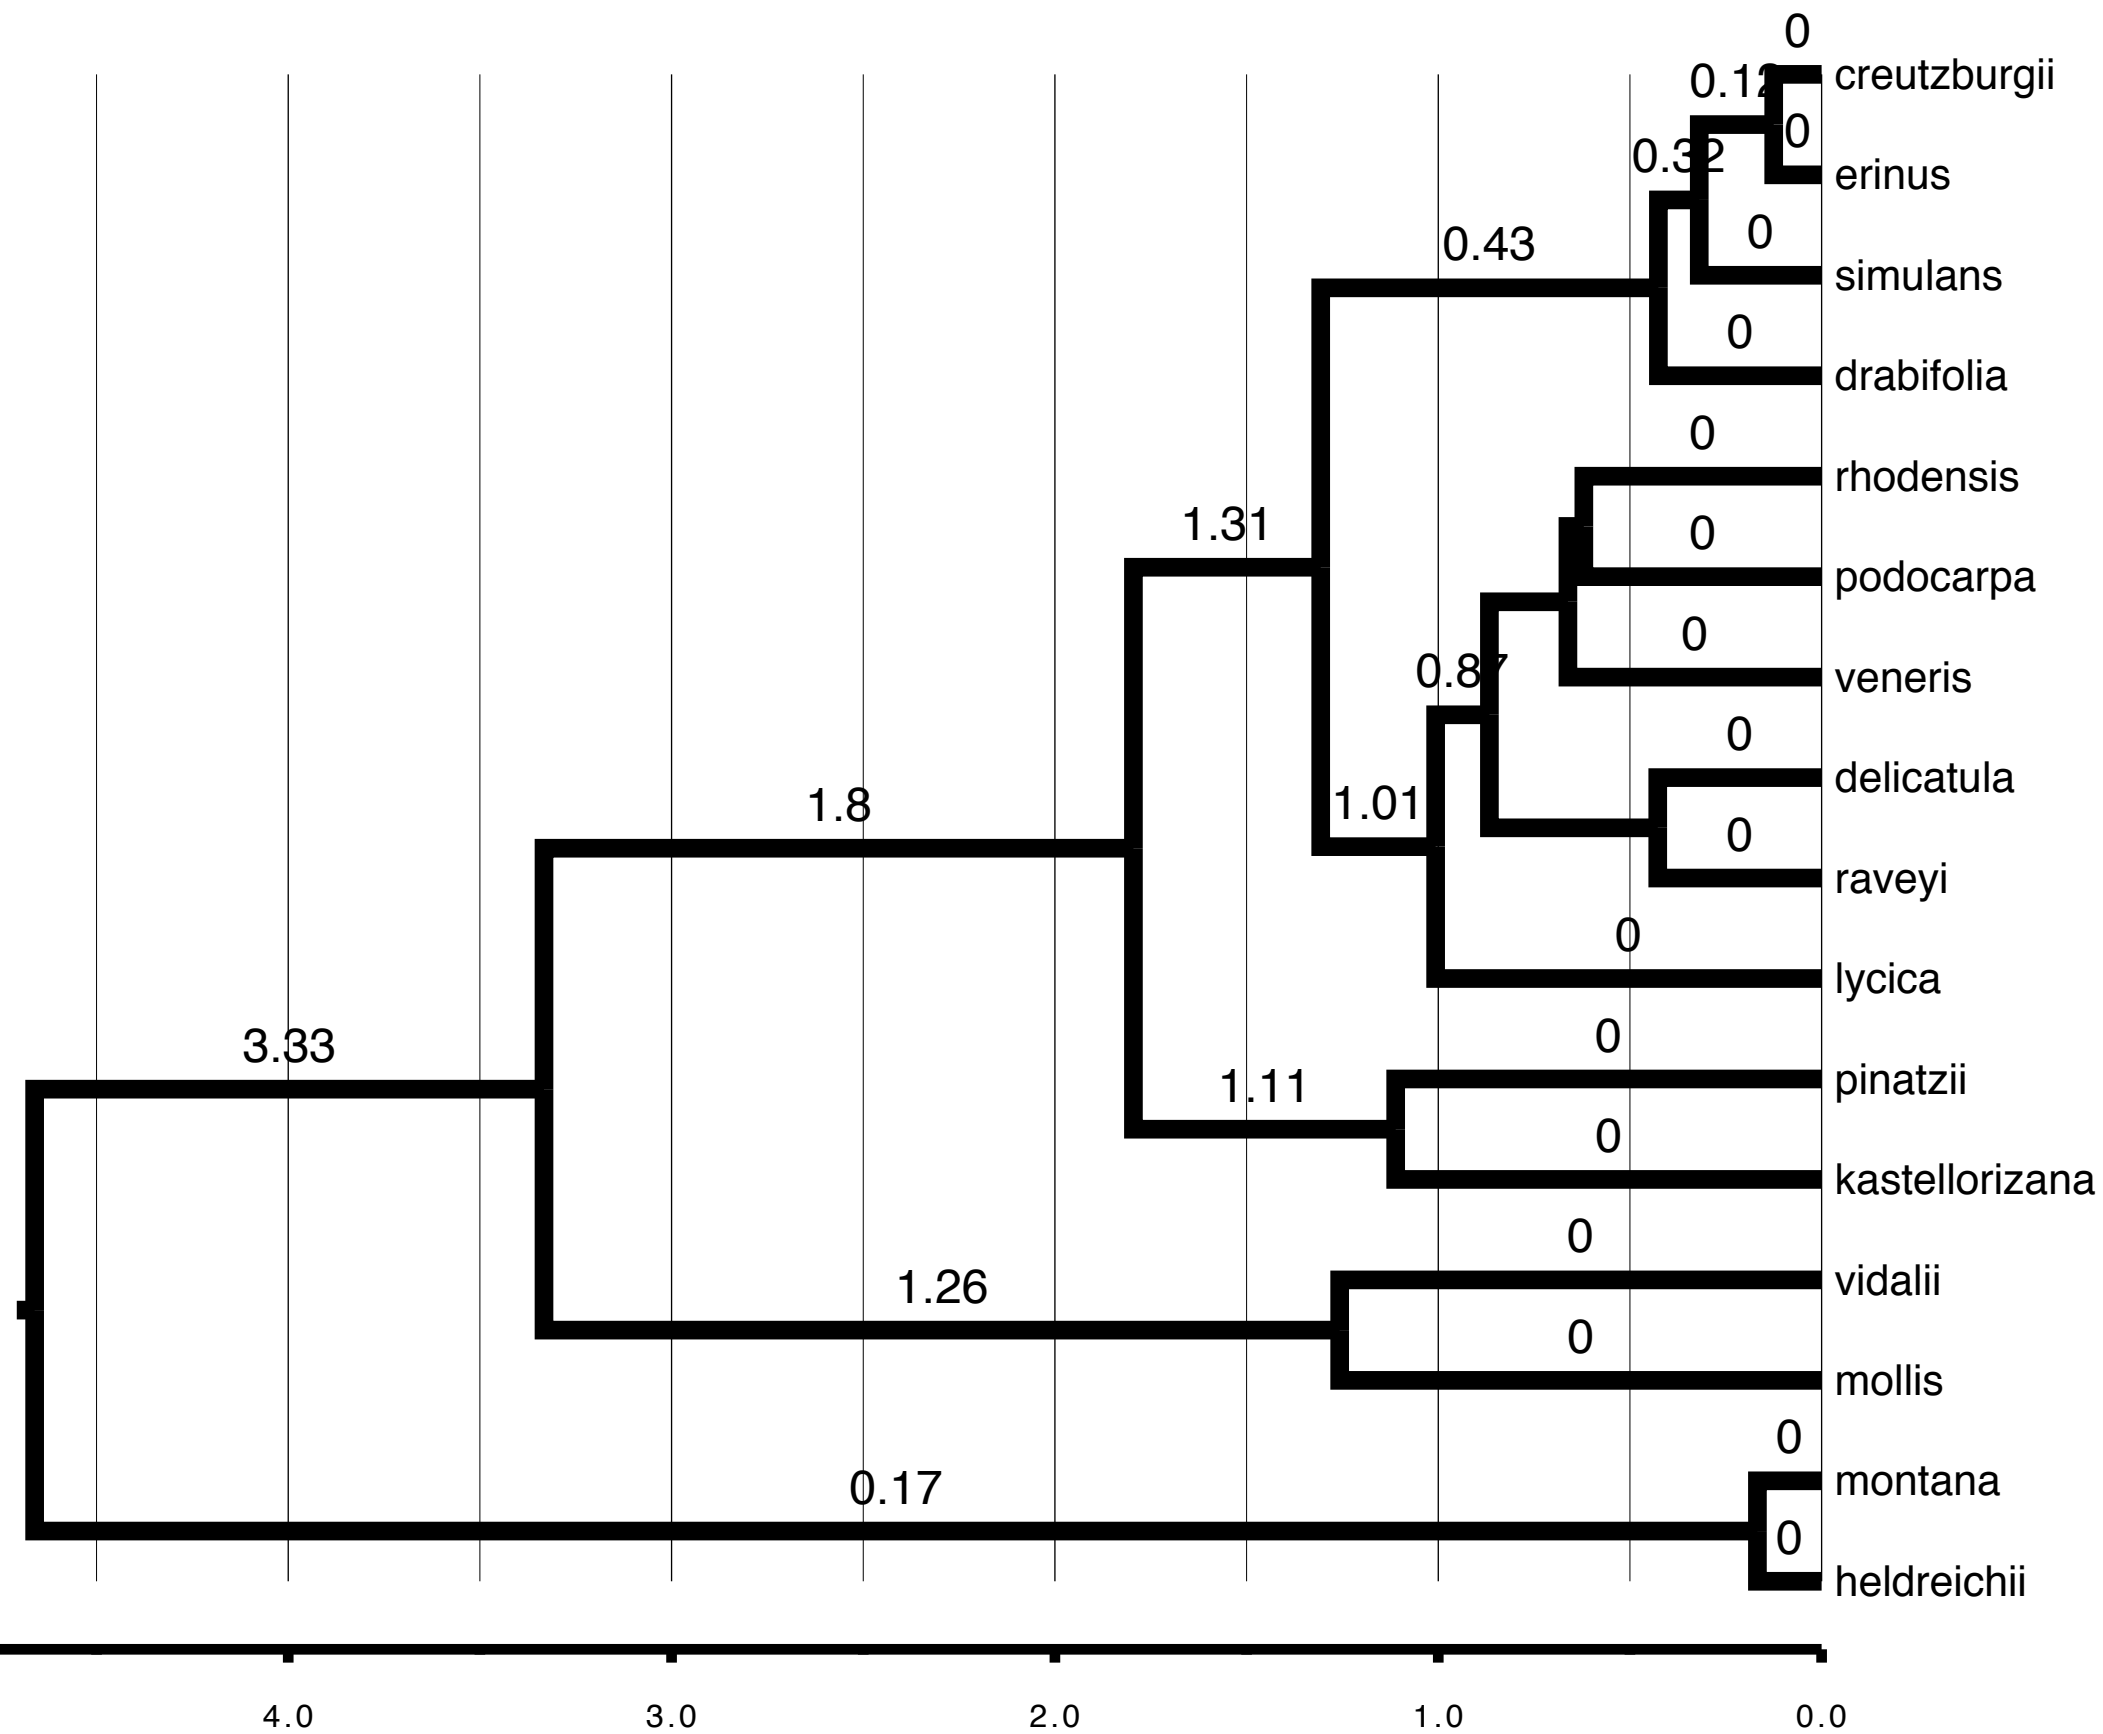

Supplement: ECE3-5-5329-s005.pdf [file ECE3-5-5329-s005.pdf]
